# Supplementary material for: Visceral Adipose Tissue Modulates Radiosensitivity in Oesophageal Adenocarcinoma
Source: PubMed Central journal article supplement — Int J Med Sci. 2019 Apr 5;16(4):519–28. doi: 10.7150/ijms.29296 (PMC6535661; doi:10.7150/ijms.29296), 2019-04-05
Supplement: ijmsv16p0519s1.pdf [file ijmsv16p0519s1.pdf]

### TRG response by obesity status

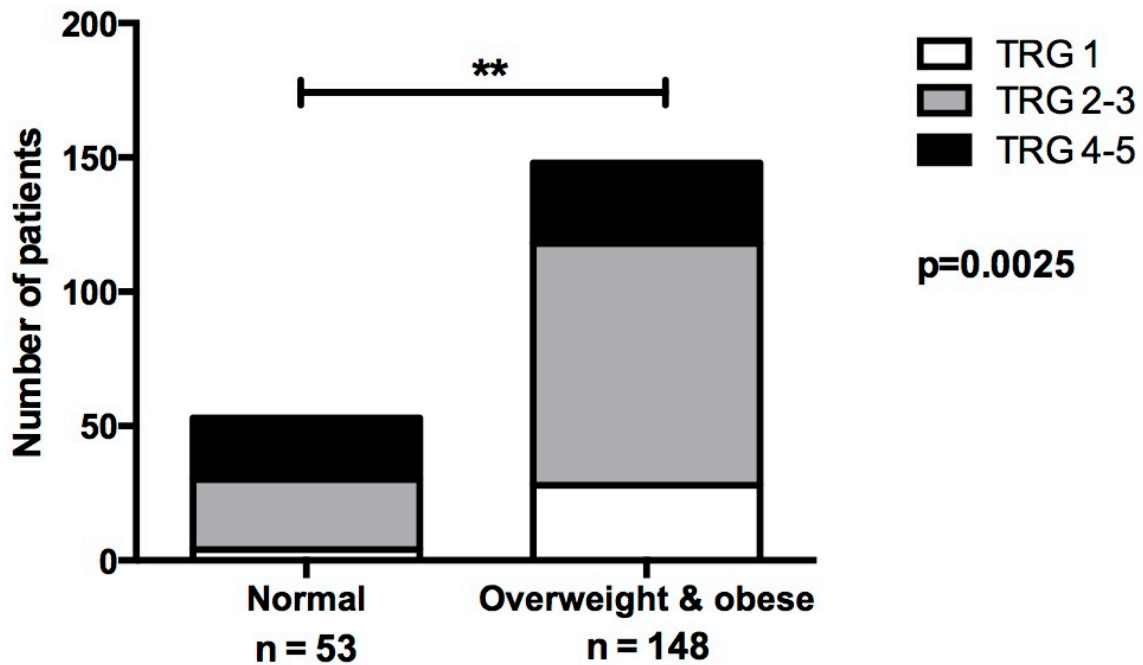

**Figure S1. Comparison of normal and overweight/obese patient cohorts in terms of tumour regression grade following NA CRT.** When classified according to the most recent TRG stratification, overweight/obese patients were more likely to achieve a complete (TRG 1) or partial (TRG 2-3) response following NA CRT (p=0.0025). Comparison of patient cohorts in terms of TRG was performed using  $\chi^2$  test. A p value of  $\leq 0.05$  was considered to be statistically significant. \*\*p<0.01.

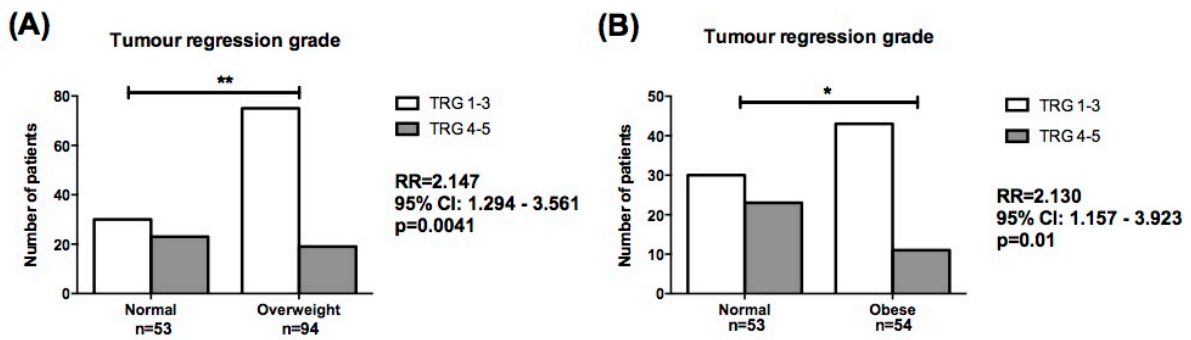

**Figure S2. Normal weight patients are less likely to achieve good tumour regression grade than overweight or obese patients following NA CRT. (A) Overweight patients were more likely to achieve a good (TRG 1-3) response following NA CRT compared to normal weight patients (RR=2.147, 95% CI=1.294-3.561, p=0.0041). (B) Obese patients were more likely to achieve a good (TRG 1-3) response following NA CRT compared to normal weight patients (RR=2.130, 95% CI=1.157-3.923, p=0.01). Comparison of patient cohorts in terms of TRG was performed using  $\chi^2$  test. A p value of  $\leq 0.05$  was considered to be statistically significant. \*p<0.05, \*\*p<0.001**

**Table S1: Anthropometric data for patient ACM (Adipose conditioned media) used in clonogenic assay**

| Patient number          | Age | Gender | BMI (kg/m <sup>2</sup> ) | WC (cm) | VFA (cm <sup>2</sup> ) |
|-------------------------|-----|--------|--------------------------|---------|------------------------|
| <b>Non-Cancer</b>       |     |        |                          |         |                        |
| <b>Obese*</b>           |     |        |                          |         |                        |
| Non-cancer 1            | 60  | Female | 23.0                     | 79      | 94.5                   |
| Non-cancer 2            | 61  | Female | 29.4                     | 89      | 212.4                  |
| Non-cancer 3            | 44  | Female | 29.1                     | 105     | 264.4                  |
| Non-cancer 4            | 47  | Female | 37.3                     | 121     | 236.9                  |
| Non-cancer 5            | 64  | Female | 37.9                     | 112     |                        |
| <b>Surgery only OAC</b> |     |        |                          |         |                        |
| <b>Nonobese</b>         |     |        |                          |         |                        |
| Surgery only OAC 1      | 60  | Female | 25.4                     | 86.0    | 73.7                   |
| Surgery only OAC 2      | 44  | Male   | 22.4                     | 79.0    | 34.1                   |
| Surgery only OAC 3      | 52  | Male   | 23.5                     | 90.0    | 109.0                  |
| Surgery only OAC 4      | 69  | Female | 21.5                     | 76.0    | 25.2                   |
| <b>Obese</b>            |     |        |                          |         |                        |
| Surgery only OAC 5      | 61  | Female | 29.8                     | 91.0    | 124.2                  |
| Surgery only OAC 6      | 47  | Male   | 33.4                     | 118.0   | 345.2                  |
| Surgery only OAC 7      | 64  | Male   | 26.8                     | 95.0    | 235.1                  |
| Surgery only OAC 8      | 67  | Male   | 27.2                     | 102.0   | 216.8                  |
| Surgery only OAC 9      | 62  | Male   | 33.8                     | 126.0   | 383.8                  |
| Surgery only OAC 10     | 71  | Male   | 22.9                     | 88.0    | 227.0                  |
| Surgery only OAC 11     | 68  | Female | 42.6                     | 129.0   | 299.3                  |
| Surgery only OAC 12     | 59  | Male   | 26.3                     | 94.0    | 217.1                  |
| Surgery only OAC 13     | 60  | Male   | 32.9                     |         | 221.7                  |
| Surgery only OAC 14     | 69  | Male   | 27.6                     | 97.0    | 165.5                  |
| <b>NA CRT OAC</b>       |     |        |                          |         |                        |
| <b>Nonobese</b>         |     |        |                          |         |                        |
| NA CRT OAC 1            | 58  | Male   | 20.6                     | 80      | 30.8                   |
| NA CRT OAC 2            | 63  | Male   |                          | 83      | 34.7                   |
| NA CRT OAC 3            | 58  | Male   | 28.0                     | 74      | 91.0                   |
| NA CRT OAC 4            | 55  | Male   | 24.4                     | 81      | 120.2                  |

| <b>Obese</b>  |    |      |      |     |       |
|---------------|----|------|------|-----|-------|
| NA CRT OAC 5  | 76 | Male | 30.7 | 114 | 354.6 |
| NA CRT OAC 6  | 51 | Male | 30.6 | 112 | 210.6 |
| NA CRT OAC 7  | 72 | Male | 27.9 | 97  | 228.8 |
| NA CRT OAC 8  | 62 | Male | 30.9 | 94  | 237.4 |
| NA CRT OAC 9  | 69 | Male | 30.2 | 101 | 280.8 |
| NA CRT OAC 10 | 63 | Male | 32.7 | 106 | 247.5 |

\*Obesity status determined by VFA as outlined in methods, except for non-cancer patient number 5 where waist circumference was used as a proxy measure for visceral obesity as VFA was not available. Waist circumference was not available for surgery only OAC patient number 13. BMI was not available for NA CRT OAC patient number 2. BMI=Body mass index; WC=Waist circumference; VFA=Visceral fat area; OAC=Oesophageal adenocarcinoma; NA CRT OAC= Neoadjuvant chemoradiotherapy oesophageal adenocarcinoma

**Table S2: Anthropometric details for comparison of ACM metabolome from non-cancer, surgery only OAC patients, and NA CRT OAC patients**

|                                                                                                                                                                                                                                                                                            |                            | <b>Non-cancer<br/>(n=6)</b> | <b>Surgery only OAC<br/>(n=6)</b> | <b>NA CRT OAC<br/>(n=6)</b> | <b>P-Value</b>  |
|--------------------------------------------------------------------------------------------------------------------------------------------------------------------------------------------------------------------------------------------------------------------------------------------|----------------------------|-----------------------------|-----------------------------------|-----------------------------|-----------------|
| Age at surgery                                                                                                                                                                                                                                                                             | Median years<br>(range)    | 64<br>(44-83)               | 61<br>(55-73)                     | 66<br>(52-76)               | NS <sup>a</sup> |
| Gender                                                                                                                                                                                                                                                                                     | Male/Female                | 2/4                         | 4/2                               | 4/2                         | NS <sup>b</sup> |
| Obesity status                                                                                                                                                                                                                                                                             | BMI (kg/m <sup>2</sup> ) * | 27.6<br>(23.8-37.3)         | 26.7<br>(22.9-33.8)               | 24.9<br>(15.4-30.7)         | NS <sup>a</sup> |
|                                                                                                                                                                                                                                                                                            | WC (cm)*                   | 90<br>(79-121)              | 95<br>(88-126)                    | 94<br>(61-228.9)            | NS <sup>a</sup> |
|                                                                                                                                                                                                                                                                                            | VFA (cm)*                  | 212.4<br>(94.5-264.4)       | 175.6<br>(106.6-383.8)            | 43.2<br>(5.7-354.5)         | NS <sup>a</sup> |
| <p>OAC=Oesophageal adenocarcinoma; BMI=Body mass index; WC=Waist circumference; VFA=Visceral fat area; NA CRT=Neoadjuvant Chemoradiotherapy; NS=non-significant; aAnalysis performed using 1-way ANOVA; bAnalysis performed <math>\chi^2</math> test; *Values given are median (range)</p> |                            |                             |                                   |                             |                 |

**Table S3: Patient cohort details for ACM used in adipokine receptor gene expression *in vitro* experiments (n=10)**

| Patient                                                                                                                                                                                                                                                             | Age | Gender | BMI (kg/m <sup>2</sup> ) | WC (cm) | VFA (cm <sup>2</sup> ) |
|---------------------------------------------------------------------------------------------------------------------------------------------------------------------------------------------------------------------------------------------------------------------|-----|--------|--------------------------|---------|------------------------|
| <b>Nonobese*</b>                                                                                                                                                                                                                                                    |     |        |                          |         |                        |
| 1                                                                                                                                                                                                                                                                   | 68  | Male   | 25.0                     | 95.0    | 127.5                  |
| 2                                                                                                                                                                                                                                                                   | 58  | Male   |                          |         | 83.0                   |
| 3                                                                                                                                                                                                                                                                   | 50  | Male   | 23.2                     | 94.0    | 87.6                   |
| 4                                                                                                                                                                                                                                                                   | 46  | Male   |                          | 100.3   | 17.0                   |
| 5                                                                                                                                                                                                                                                                   | 58  | Male   | 20.6                     | 80.0    | 30.8                   |
| <b>Obese</b>                                                                                                                                                                                                                                                        |     |        |                          |         |                        |
| 6                                                                                                                                                                                                                                                                   | 68  | Male   | 28.8                     | 104.0   | 284.8                  |
| 7                                                                                                                                                                                                                                                                   | 72  | Male   | 30.1                     | 106.7   | 240.6                  |
| 8                                                                                                                                                                                                                                                                   | 67  | Male   | 27.2                     | 102.0   | 216.8                  |
| 9                                                                                                                                                                                                                                                                   | 62  | Male   | 33.8                     | 126.0   | 383.8                  |
| 10                                                                                                                                                                                                                                                                  | 71  | Male   | 22.9                     | 88.0    | 227.0                  |
| *Obesity status determined by VFA as outlined in methods. BMI=Body mass index; WC=Waist circumference; VFA=Visceral fat area; NA CRT=Neoadjuvant chemoradiotherapy. BMI was not available for patients 2 and 4. Waist circumference was not available for patient 2 |     |        |                          |         |                        |

**Table S4: Clinical and pathological details for normal and overweight/obese patients**

| <b>PATIENT DETAILS</b>      | <b>NORMAL<br/>(n=53)</b> |          | <b>OVERWEIGHT &amp;<br/>OBESE (n=148)</b> |          | <b>ALL (n=201)</b> |          | <b>P<br/>Value</b>      |
|-----------------------------|--------------------------|----------|-------------------------------------------|----------|--------------------|----------|-------------------------|
| <b>DEMOGRAPHICS</b>         |                          |          |                                           |          |                    |          |                         |
| Age median (range)          | 61 (30-75)               |          | 62 (37-77)                                |          | 61 (30-77)         |          | 0.19 <sup>a</sup>       |
| Male gender                 | 42                       | 75%      | 126                                       | 85%      | 168                | 86%      | 0.39 <sup>b</sup>       |
| <b>ASA GRADE</b>            | <b>n</b>                 | <b>%</b> | <b>n</b>                                  | <b>%</b> | <b>n</b>           | <b>%</b> |                         |
| ASA Grade 1                 | 26                       | 49%      | 70                                        | 47%      | 96                 | 48%      | 1.00 <sup>c</sup>       |
| ASA Grade 2                 | 22                       | 42%      | 70                                        | 47%      | 92                 | 46%      |                         |
| ASA Grade 3                 | 5                        | 9%       | 8                                         | 6%       | 13                 | 6%       |                         |
| <b>TUMOUR SITE</b>          | <b>n</b>                 | <b>%</b> | <b>n</b>                                  | <b>%</b> | <b>n</b>           | <b>%</b> |                         |
| Middle oesophagus           | 1                        | 2%       | 2                                         | 1%       | 3                  | 1%       | 0.44 <sup>d</sup>       |
| Lower oesophagus            | 1                        | 2%       | 3                                         | 2%       | 4                  | 2%       |                         |
| Oesophago-gastric junction  | 51                       | 96%      | 143                                       | 97%      | 194                | 97%      |                         |
| <i>OGJ I</i>                | 22                       |          | 83                                        |          | 48                 |          |                         |
| <i>OGJ II</i>               | 23                       |          | 53                                        |          | 20                 |          |                         |
| <i>OGJ III</i>              | 6                        |          | 7                                         |          | 3                  |          |                         |
| <b>CLINICAL T STAGE</b>     | <b>n</b>                 | <b>%</b> | <b>n</b>                                  | <b>%</b> | <b>n</b>           | <b>%</b> |                         |
| Clinical stage TiS          | 1                        | 2%       | 1                                         | 1%       | 2                  | 1%       | 0.47 <sup>c</sup>       |
| Clinical stage T1           | 1                        | 2%       | 3                                         | 2%       | 4                  | 2%       |                         |
| Clinical stage T2           | 6                        | 11%      | 13                                        | 9%       | 19                 | 10%      |                         |
| Clinical stage T3           | 42                       | 79%      | 124                                       | 84%      | 166                | 83%      |                         |
| Clinical stage T4           | 1                        | 2%       | 2                                         | 1%       | 3                  | 1%       |                         |
| Clinical stage Tx           | 2                        | 4%       | 5                                         | 3%       | 7                  | 3%       |                         |
| <b>PATHOLOGICAL T STAGE</b> | <b>n</b>                 | <b>%</b> | <b>n</b>                                  | <b>%</b> | <b>n</b>           | <b>%</b> |                         |
| TiS                         | 0                        |          | 3                                         | 2%       | 3                  | 1%       | <b>0.02<sup>e</sup></b> |
| T0                          | 3                        | 6%       | 26                                        | 18%      | 29                 | 15%      |                         |
| T1                          | 6                        | 11%      | 25                                        | 17%      | 31                 | 16%      |                         |
| T2                          | 5                        | 9%       | 26                                        | 18%      | 31                 | 16%      |                         |
| T3                          | 38                       | 72%      | 63                                        | 42%      | 101                | 50%      |                         |
| T4                          | 1                        | 2%       | 2                                         | 1%       | 3                  | 1%       |                         |

|                             |          |          |          |          |          |          |                          |
|-----------------------------|----------|----------|----------|----------|----------|----------|--------------------------|
| Tx                          | 0        |          | 3        | 2%       | 3        | 1%       |                          |
| <b>PATHOLOGICAL N STAGE</b> | <b>n</b> | <b>%</b> | <b>n</b> | <b>%</b> | <b>n</b> | <b>%</b> |                          |
| N0                          | 22       | 41%      | 77       | 52%      | 99       | 49%      | 0.20 <sup>f</sup>        |
| N1                          | 25       | 47%      | 62       | 42%      | 87       | 43%      |                          |
| N2                          | 4        | 7%       | 5        | 3%       | 9        | 5%       |                          |
| N3                          | 2        | 4%       | 2        | 1%       | 4        | 2%       |                          |
| Nx                          | 0        |          | 2        | 1%       | 2        | 1%       |                          |
| <b>ANALYSED NODES</b>       | <b>n</b> | <b>%</b> | <b>n</b> | <b>%</b> | <b>n</b> | <b>%</b> |                          |
| Median                      | 15       |          | 17       |          | 15       |          | 0.25 <sup>g</sup>        |
| Range                       | 0-41     |          | 0-37     |          | 0-41     |          |                          |
| <b>RESIDUAL TUMOUR</b>      | <b>n</b> | <b>%</b> | <b>n</b> | <b>%</b> | <b>n</b> | <b>%</b> |                          |
| R0                          | 43       | 81%      | 121      | 82%      | 164      | 81%      | 0.84 <sup>h</sup>        |
| R1                          | 10       | 19%      | 26       | 17%      | 36       | 18%      |                          |
| R2                          | 0        |          | 1        | 1%       | 1        | 1%       |                          |
| <b>TRG</b>                  | <b>n</b> | <b>%</b> | <b>n</b> | <b>%</b> | <b>n</b> | <b>%</b> |                          |
| TRG 1                       | 4        | 8%       | 28       | 19%      | 32       | 16%      | <b>0.002<sup>i</sup></b> |
| TRG 2                       | 12       | 23%      | 38       | 26%      | 50       | 25%      |                          |
| TRG 3                       | 14       | 26%      | 52       | 35%      | 66       | 33%      |                          |
| TRG 4                       | 19       | 36%      | 28       | 19%      | 47       | 23%      |                          |
| TRG 5                       | 4        | 8%       | 2        | 1%       | 6        | 3%       |                          |

ASA=American society of anaesthesiologists' classification of physical health; OGJ=Oesophago-gastric junction; TRG=Tumour regression grade; Tis=In situ; Tx=Not assessed; a=Analysed by Mann Whitney U test; b=male vs. female analysed by  $\chi^2$  test; c=ASA 1 vs. ASA 2-3, analysed by  $\chi^2$  test; d=AEG vs. other site analysed by  $\chi^2$  test; e=Tis/T0-T2 vs. T3-4, analysed by  $\chi^2$  test; f=N0 vs. N1-3, analysed by  $\chi^2$  test; g=analysed by unpaired two tailed t test; h=R0 vs. R1-2, analysed by  $\chi^2$  test; i=TRG1-3 vs. TRG 4-5 analysed by  $\chi^2$  test.
